# Supplementary material
Source: ML conference proceedings conference paper supplement (https://proceedings.mlr.press/v130/mehmood21a.html)
Supplement: Supplementary file 1 [file mehmood21a-supp.pdf]

---

# Differentiating the Value Function by using Convex Duality

---

## A Additional Experiments

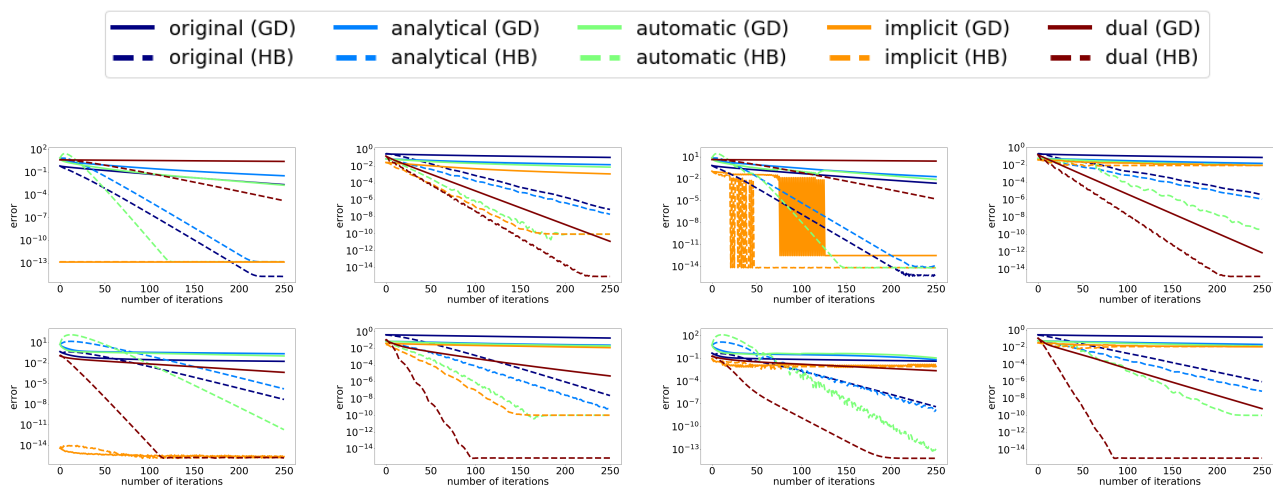

Figure 3: Error plots for problems listed in Section 3 for two more values of  $P$ , i.e., 70 (top row) and 30 (bottom row).
